# Supplementary material for: Fabrication of heparinized hierarchically hollow hydroxyapatite microspheres as bone substitute for controlled growth factors delivery
Source: Royal Society of Chemistry journal article supplement (doi:10.1039/c3ra00095h), 2013-01-01
Supplement: c3ra00095h.pdf [file c3ra00095h.pdf]

## Supporting Information

### **Fabrication of heparinized hierarchically hollow hydroxyapatite microspheres as bone substitute for controlled growth factors delivery**

**Qiang Wu,\*<sup>ab</sup> Chaoqun Liu,<sup>a</sup> Luna Fan,<sup>a</sup> Jiahua Shi,\*<sup>b</sup> Huanxia Jia,<sup>a</sup> Qiaofang**

**Qi,<sup>a</sup> Feng-Hua Chen<sup>c</sup>**

*<sup>a</sup> Institute of Environmental and Medicine, College of Pharmacy, Henan University, Kaifeng, 475004, P.R. China. E-mail: henuwuqiang@henu.edu.cn; Tel: +86-378-3880680; Fax: +86-378-3880680.*

*<sup>b</sup> Key Laboratory of Natural Medicine and Immuno-Engineering of Henan Province, Henan University, Kaifeng, 475004, P.R. China. E-mail: sjiahua@henu.edu.cn; Tel: +86-378-2864665; Fax: +86-378-2864665.*

*<sup>c</sup> School of Material and Chemical Engineering, Zhengzhou University of Light Industry, 5 Dongfeng Road, Zhengzhou, 450002, P.R. China. E-mail: cfh\_ciac@yahoo.com.cn; Tel: +86-371-63556510; Fax: +86-371-63556510.*

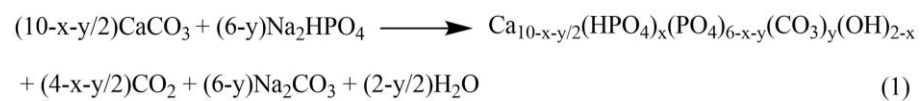

Equation S1. The chemical reaction equation of hydroxylcarbonte apatite.

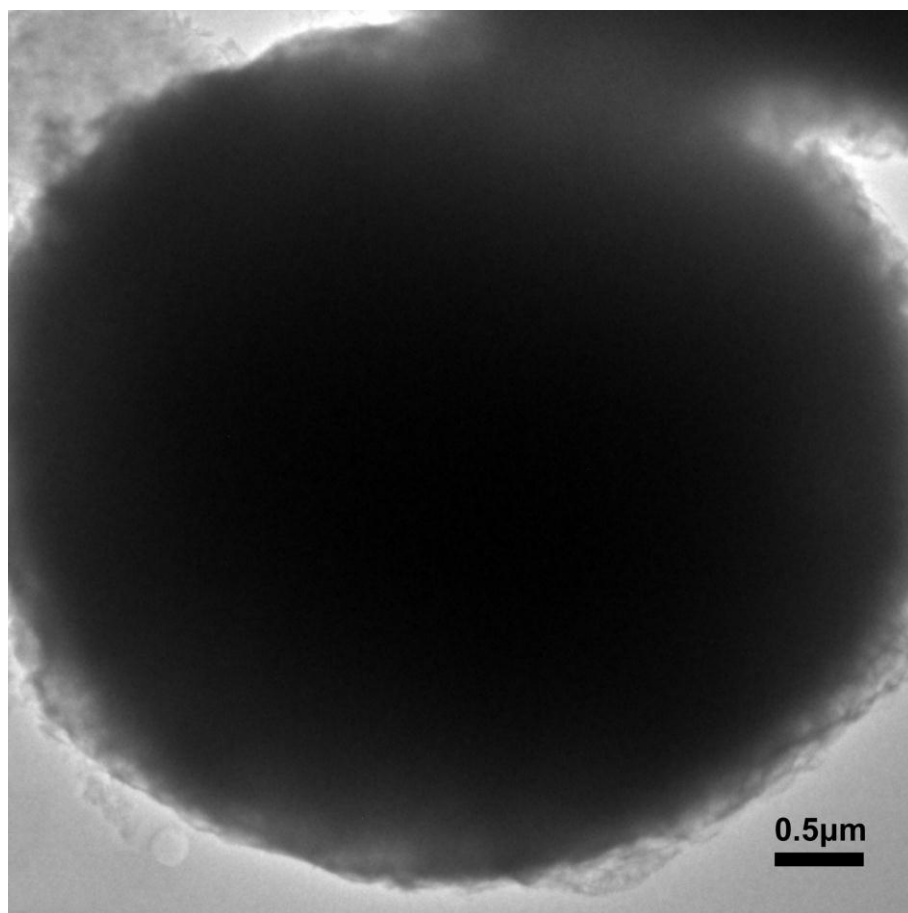

Figure S1. TEM images of pure CaCO<sub>3</sub> particles after soaking in emulsion solution for 24 h.

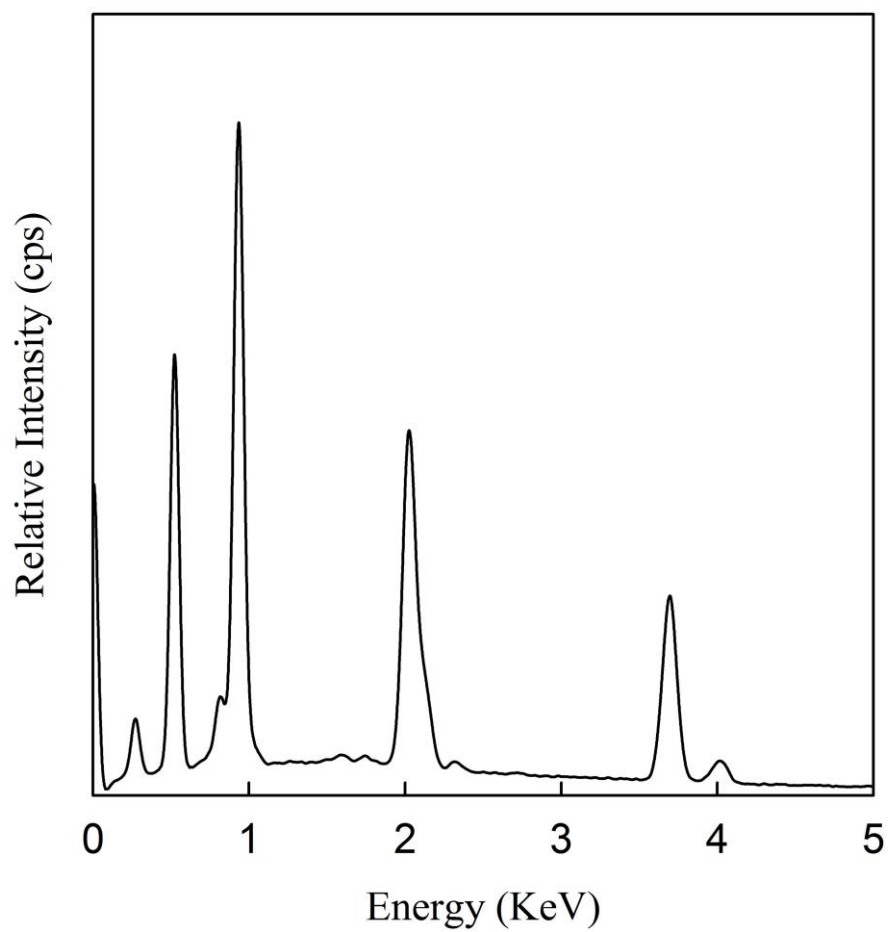

Figure S2. EDX spectra of HHAMs-HP converted from CCPs-HP by treatment with emulsion solution for 24 h.

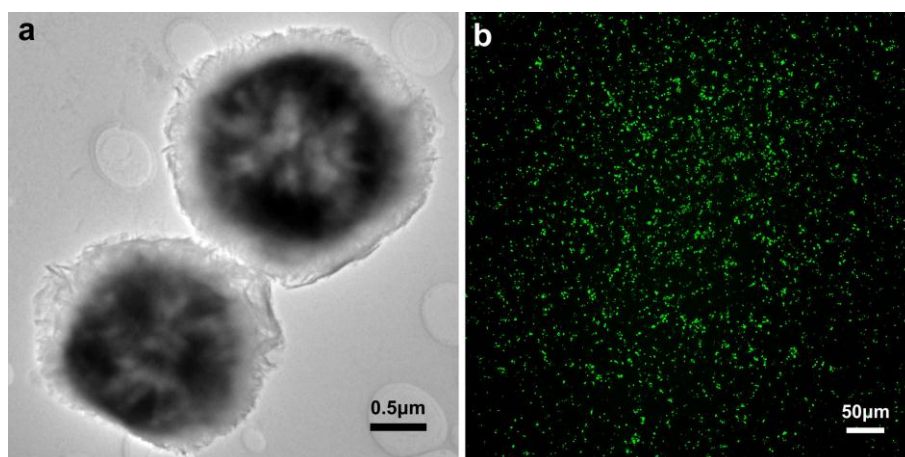

Figure S3. TEM (a) and fluorescence (b) images of  $\text{CaCO}_3$  particles with FITC-labeled heparin after soaking in emulsion solution for 24 h.

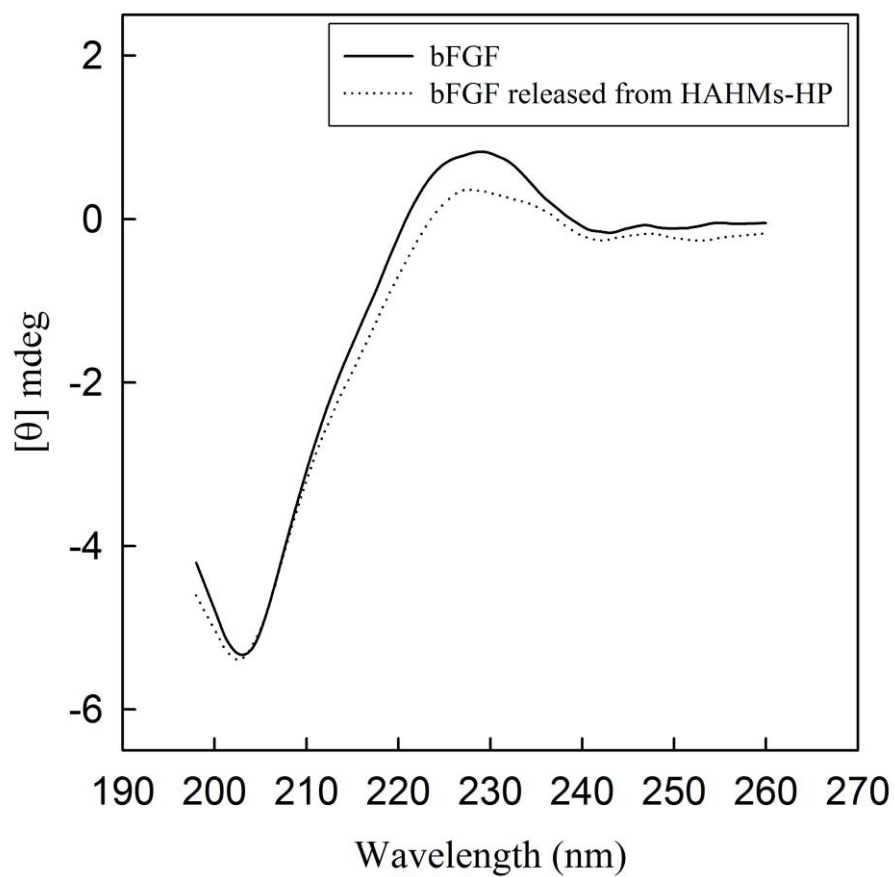

Figure S4. CD spectra acquired at 20 °C of bFGF.
